# Supplementary material for: Study protocol for investigating the performance of an automated blood test measuring GFAP and UCH-L1 in a prospective observational cohort of patients with mild traumatic brain injury: European BRAINI study
Source: PubMed Central journal article supplement (PMC7908910; doi:10.1136/bmjopen-2020-043635), 2021-02-25
Supplement: bmjopen-2020-043635.draft_revisions.pdf [file bmjopen-2020-043635.draft_revisions.pdf]

# BMJ Open

BMJ Open is committed to open peer review. As part of this commitment we make the peer review history of every article we publish publicly available.

When an article is published we post the peer reviewers' comments and the authors' responses online. We also post the versions of the paper that were used during peer review. These are the versions that the peer review comments apply to.

The versions of the paper that follow are the versions that were submitted during the peer review process. They are not the versions of record or the final published versions. They should not be cited or distributed as the published version of this manuscript.

BMJ Open is an open access journal and the full, final, typeset and author-corrected version of record of the manuscript is available on our site with no access controls, subscription charges or pay-per-view fees (<http://bmjopen.bmj.com>).

If you have any questions on BMJ Open's open peer review process please email [info.bmjopen@bmj.com](mailto:info.bmjopen@bmj.com)

# BMJ Open

## Predictive performance of an automated assay for GFAP and UCH-L1 blood concentrations in mild Traumatic BRAIN Injury: European BRAINI study

|                               |                                                                                                                                                                                                                                                                                                                                                                                                                                                                                                                                                                                                                                                                                                                                                                                                     |
|-------------------------------|-----------------------------------------------------------------------------------------------------------------------------------------------------------------------------------------------------------------------------------------------------------------------------------------------------------------------------------------------------------------------------------------------------------------------------------------------------------------------------------------------------------------------------------------------------------------------------------------------------------------------------------------------------------------------------------------------------------------------------------------------------------------------------------------------------|
| Journal:                      | <i>BMJ Open</i>                                                                                                                                                                                                                                                                                                                                                                                                                                                                                                                                                                                                                                                                                                                                                                                     |
| Manuscript ID                 | bmjopen-2020-043635                                                                                                                                                                                                                                                                                                                                                                                                                                                                                                                                                                                                                                                                                                                                                                                 |
| Article Type:                 | Protocol                                                                                                                                                                                                                                                                                                                                                                                                                                                                                                                                                                                                                                                                                                                                                                                            |
| Date Submitted by the Author: | 09-Aug-2020                                                                                                                                                                                                                                                                                                                                                                                                                                                                                                                                                                                                                                                                                                                                                                                         |
| Complete List of Authors:     | Richard, Marion; Universite Grenoble Alpes, Department of Anaesthesia and Intensive Care, Centre Hospitalier Universitaire Grenoble Alpes, Grenoble Institut des Neurosciences, INSERM, U1216, 38000 Lagares, Alfonso; Hospital Universitario 12 de Octubre Servicio de Neurocirugia, imas12; Universidad Complutense de Madrid, Surgery Bondanese, Victor; bioMerieux SA, Clinical Unit de la Cruz, Javier; Instituto de investigación imas12, Hospital Universitario 12 de Octubre, SAMID Mejan, Odile; bioMerieux SA, Clinical Unit Pavlov, Vladislav; bioMerieux SA, Medical Affairs Payen, Jean-François ; Universite Grenoble Alpes, Department of Anaesthesia and Intensive Care, Centre Hospitalier Universitaire Grenoble Alpes, Grenoble Institut des Neurosciences, INSERM, U1216, 38000 |
| Keywords:                     | ACCIDENT & EMERGENCY MEDICINE, NEUROSURGERY, TRAUMA MANAGEMENT, Computed tomography < RADIOLOGY & IMAGING                                                                                                                                                                                                                                                                                                                                                                                                                                                                                                                                                                                                                                                                                           |
|                               |                                                                                                                                                                                                                                                                                                                                                                                                                                                                                                                                                                                                                                                                                                                                                                                                     |

SCHOLARONE™  
Manuscripts

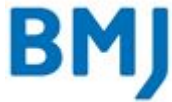

I, the Submitting Author has the right to grant and does grant on behalf of all authors of the Work (as defined in the below author licence), an exclusive licence and/or a non-exclusive licence for contributions from authors who are: i) UK Crown employees; ii) where BMJ has agreed a CC-BY licence shall apply, and/or iii) in accordance with the terms applicable for US Federal Government officers or employees acting as part of their official duties; on a worldwide, perpetual, irrevocable, royalty-free basis to BMJ Publishing Group Ltd ("BMJ") its licensees and where the relevant Journal is co-owned by BMJ to the co-owners of the Journal, to publish the Work in this journal and any other BMJ products and to exploit all rights, as set out in our [licence](#).

The Submitting Author accepts and understands that any supply made under these terms is made by BMJ to the Submitting Author unless you are acting as an employee on behalf of your employer or a postgraduate student of an affiliated institution which is paying any applicable article publishing charge ("APC") for Open Access articles. Where the Submitting Author wishes to make the Work available on an Open Access basis (and intends to pay the relevant APC), the terms of reuse of such Open Access shall be governed by a Creative Commons licence – details of these licences and which [Creative Commons](#) licence will apply to this Work are set out in our licence referred to above.

Other than as permitted in any relevant BMJ Author's Self Archiving Policies, I confirm this Work has not been accepted for publication elsewhere, is not being considered for publication elsewhere and does not duplicate material already published. I confirm all authors consent to publication of this Work and authorise the granting of this licence.

1  
2  
3 **Predictive performance of an automated assay for GFAP and UCH-**  
4 **L1 blood concentrations in mild Traumatic BRAIN Injury: European**  
5 **BRAINI study**  
6  
7  
8  
9  
10  
11

12 Marion Richard<sup>1</sup>, Alfonso Lagares<sup>2</sup>, Victor Bondanese<sup>3</sup>, Javier De la Cruz<sup>4</sup>, Odile  
13 Meján<sup>3</sup>, Vladislav Pavlov<sup>5</sup>, Jean-François Payen<sup>1</sup>, BRAINI Investigators

14  
15  
16 <sup>1</sup> Univ. Grenoble Alpes, Department of Anaesthesia and Intensive Care, Centre  
17 Hospitalier Universitaire Grenoble Alpes, Grenoble Institut des Neurosciences,  
18 INSERM, U1216, 38000 Grenoble, France

19  
20  
21 <sup>2</sup> Servicio de Neurocirugía, Hospital Universitario 12 de Octubre, Universidad  
22 Complutense de Madrid, Instituto de Investigación imas12, Madrid, Spain

23  
24  
25 <sup>3</sup> bioMérieux, Clinical Unit, Chemin de l'Orme, 69280 Marcy l'Etoile, France

26  
27  
28 <sup>4</sup> Instituto de Investigación imas12, Hospital Universitario 12 de Octubre, SAMID  
29 Madrid, Spain

30  
31  
32 <sup>5</sup> bioMérieux, Medical Affairs, Chemin de l'Orme, 69280 Marcy l'Etoile, France  
33  
34  
35  
36  
37  
38  
39  
40  
41  
42

43 **Corresponding Author:**

44 **Prof. Alfonso Lagares**, Servicio de Neurocirugía, Hospital Universitario 12 de  
45 Octubre, Universidad Complutense de Madrid, Instituto de Investigación imas12,  
46 Madrid, Spain. Avda de Cordoba s/n, Madrid 28041. Email: alfonlag@ucm.es  
47  
48  
49  
50  
51  
52  
53  
54  
55  
56  
57  
58  
59  
60

## ABSTRACT

**Introduction:** Mild traumatic brain injury (mTBI) is a common cause of clinical consultation in the Emergency Department. Patients with mTBI may undergo brain CT scans based on clinical criteria. However, the proportion of patients with brain lesions on CT is very low. Two serum biomarkers, glial fibrillary acidic protein (GFAP) and ubiquitin carboxy-terminal hydrolase L1 (UCH-L1), have been shown to discriminate patients regarding the presence or absence of brain lesions on initial CT scan when assessed within the first 12 hours after TBI. However, the current technique for measuring serum concentrations of GFAP and UCH-L1 is manual and time consuming, which may hinder its use in routine clinical practice. This study assesses the diagnostic accuracy of an automated assay for the measurement of serum GFAP and UCH-L1 in a cohort of mTBI patients who received a CT scan as the standard of care.

**Methods and analysis:** This is a prospective multicentre observational study of 1760 mTBI patients recruited in France and Spain across 12 participating sites. Adult patients with an initial Glasgow Coma Scale score of 13-15 and a brain CT-scan underwent blood sampling within 12 hours after TBI. The primary outcome measure is the diagnostic performance of an automated assay measuring serum concentrations of GFAP and UCH-L1 for discriminating between patients with positive and negative findings on brain CT-scans. Secondary outcome measures include the performance of these two biomarkers in predicting the neurological status and quality of life at 1 week and 3 months after the trauma.

**Ethics and dissemination:** Ethics approval was obtained by the Institutional Review Board of Sud-Ouest Outre Mer III in France (Re#2019-A01525-52) and Hospital 12 de Octubre in Spain (Re#19/322). The results will be presented at scientific meetings and published in peer-reviewed publications.

**Trial registration number (ClinicalTrials.gov):** NCT04032509

**Key words:** Traumatic brain injury, biomarkers, diagnostic techniques and procedures, GFAP, UCH-L1, serum, computerized tomography, prognosis.

## STRENGTHS AND LIMITATIONS OF THE STUDY

- This is a large prospective multicentre study to validate the value of serum biomarkers GFAP and UCH-L1 in predicting brain CT-scan findings after mTBI.
- The additional value of these two biomarkers will be assessed regarding neurological outcome and quality of life.
- Variability in the management of mTBI patients and in the indications of CT-scans may influence the rate of positive CT scans in the different participating centres, which may have an impact on the statistical power of the study.

## INTRODUCTION

Mild traumatic brain injury (mTBI), as defined by a Glasgow Coma Scale (GCS) score of 13-15 [1], represents a frequent admission in the Emergency Department (ED) [2–4]. The initial management includes a non-contrast brain computed tomography (CT) scan if the patient meets specific conditions. However, the prevalence of CT-detected abnormalities is less than 10% among mTBI patients, and less than 1% of them will require neurosurgical procedures. Efforts have been made for decades to optimize the indications for brain CT scans after mTBI such as the New Orleans Criteria [5] and Canadian Head CT Rule [6] as well as national guidelines such as the French guidelines [7]. However, a certain variability exists among physicians regarding CT scan indications and some situations post-TBI may be confusing, e.g. intoxicated patients or patients with hearing loss or speech disturbances. As a consequence, up to 40% of CT scans prescribed in EDs would actually do not follow guideline recommendations [8], reflecting a substantial CT overuse.

Clinical decision rules for initial CT scan can be optimized with the use of an objective parameter that is easily and rapidly assessed. This could be achieved using blood concentrations of brain-damage biomarkers. Among candidates, serum protein S100B is the only biomarker used in Europe. The Scandinavian guidelines for the initial management of mild and moderate head injuries in adults provide recommendations for the use of S100B to rule out the need for head CT in mTBI. Multicentre validation of Scandinavian Guidelines is currently in progress in Sweden (\**ClinicalTrials.gov*, 2017, NCT03280485). Unfortunately, the blood concentration of S100B can be affected by several factors such as multiple trauma, skin colour, presence of melanomas, and its clinical utility is limited by the short half-life (3h) of S100B in blood [9].

Recently, serum levels of ubiquitin carboxy-terminal hydrolase-L1 (UCH-L1) and glial fibrillary acidic protein (GFAP), two brain-specific proteins, were found to be elevated in patients with intracranial lesions visible on CT scans [10,11]. Data from the ALERT-TBI trial showed that serum GFAP and UCH-L1 protein concentrations are able to reliably predict the absence of clinically relevant lesions on CT scan in patients with mTBI [12]. The Banyan Brain Trauma Indicator (*Banyan BTI*<sup>TM</sup>

1  
2  
3 *Package Insert*) has obtained FDA-clearance in February 2018. This is a manual  
4 immunoassay that measures GFAP and UCH-L1 serum concentrations with a  
5 sensitivity (95% lower confidence limit) and negative predictive value (95% lower  
6 confidence limit) of 97.5% (93.7%) and 99.6% (98.8%), respectively[13]. However,  
7 the manual ELISA technique takes 4 hours to provide results, which is too long for  
8 mTBI triage in the ED setting. In addition, the cut-offs used in the ALERT-TBI trial  
9 need to be externally validated [12,14].

10  
11  
12  
13  
14  
15  
16 A faster *in vitro* diagnostic (IVD) technique is then required for a possible use in  
17 clinical practice, together with an external validation of the diagnostic accuracy of  
18 GFAP and UCH-L1 in mTBI patients [15–18]. An automated assay assessing serum  
19 concentrations of GFAP and UCH-L1 (VIDAS® BTI assay, bioMérieux, Marcy l'Etoile,  
20 France) has been developed. The primary objective of the study is to evaluate the  
21 diagnostic performance of the VIDAS® BTI assay in a prospective multicentre cohort  
22 of mTBI patients with respect to their brain CT scan findings. The secondary  
23 objectives are to assess the ability of the two biomarkers to predict the neurological  
24 status and quality of life at 1 week and 3 months after mTBI.  
25  
26  
27  
28  
29  
30  
31  
32  
33

## 34 **METHODS AND ANALYSIS**

### 35 **Study design**

36  
37  
38  
39 BRAINI is a prospective, multicentre, observational study in France and Spain.  
40  
41

### 42 **Study setting**

43  
44 BRAINI includes 11 sites in France within university hospitals (Grenoble, Lyon  
45 Edouard-Herriot, Lyon-Sud, Tours, Nantes, Dijon, Poitiers, Montpellier and Toulouse)  
46 and non-university hospitals (Annecy and Villefranche-sur-Saone) and 3 sites in  
47 Madrid, Spain, including University Hospital 12 de Octubre, University Hospital  
48 Gregorio Marañón and Hospital del Tajo. Each centre was chosen based on  
49 documentation with regard to patient availability and experience in mild TBI patient  
50 management.  
51  
52  
53  
54  
55  
56  
57  
58

### 59 **Study population**



1  
2  
3 Patients will be included if they meet the following criteria: age >18 years (France)  
4 and > 15 years old (Spain), admitted for a mild TBI with GCS score 13-15, requiring  
5 brain CT scan as part of standard of care according to the French guidelines [7] or to  
6 the in-charge physician in Spain, and 10-mL blood sample obtained as part of routine  
7 blood samples within 12 hours after injury.  
8  
9

10  
11  
12 Patients will be excluded if they have at least one of the following criteria: GCS score  
13 3-12 on admission; time of injury unknown; time since injury exceeding 12 hours;  
14 primary admission for non-traumatic neurological disorder (e.g., stroke, spontaneous  
15 intracranial hematoma); penetrating head injury; mechanical ventilation;  
16 neuropsychiatric and neurologic co-morbidities that might interfere with the  
17 assessment of outcomes at 1 week and 3 months; venepuncture not feasible; no  
18 brain CT scan; subject under judiciary control; pregnant or breastfeeding woman; or  
19 participation in another therapeutic study.  
20  
21  
22  
23  
24  
25  
26  
27

## 28 **Study outcomes**

29  
30 The primary outcome measure is the performance of the VIDAS BTI assay in terms  
31 of sensitivity, specificity, positive predictive value (PPV), negative predictive value  
32 (NPV) and their corresponding lower limit of the 95% confidence interval with respect  
33 to brain CT scan findings, i.e., positive vs. negative (see below).  
34  
35  
36

37 Secondary outcomes are measured at 1 week and 3 months post-TBI and include  
38 neurological status, i.e., stable or degraded condition, and quality of life assessed  
39 using the QOLIBRI questionnaire (quality of life after TBI) [19–21] at 1 week. At 3  
40 months post-TBI, patients will be assessed according to the Extended Glasgow  
41 Outcome Scale (GOSE) [22,23], the 5-level EQ-5D version [24], the QOLIBRI scale,  
42 and the Rivermead Post-concussion Symptoms Questionnaire (RPQ) [25]. The study  
43 design and flow is shown in Fig.1.  
44  
45  
46  
47  
48  
49  
50

## 51 **Data collection and data monitoring**

52 At each participating site, data will be collected and entered into the web-based  
53 electronic CRF (eCRF) (Medsharing, Fontenay-sous-Bois, France) by clinical  
54 research associates under the supervision of the site principal investigators. The  
55 study database will be created from the eCRF. Trained research coordinators will  
56 monitor the data collection. The study will collect demographic and baseline  
57  
58  
59  
60

1  
2  
3 information at admission, the reason to prescribe brain CT scan and immediate CT  
4 findings by the local radiologist, biological data if indicated by the in-charge  
5 physician, a 10-ml study-specific blood sample within 12 hours after trauma, and  
6 functional outcomes at 1 week and 3 months. At one week post-TBI, clinical research  
7 associates will transmit information regarding the neurological status of the patients  
8 to the coordinating centres (University Hospital Grenoble Alpes and University  
9 Hospital 12 de Octubre, Madrid). Questionnaires at 3 months will be conducted by  
10 trained central outcome assessors during a structured telephone interview.  
11 Anonymized data from brain CT images will be transferred to a centralized platform  
12 to be evaluated by a trained neuroradiologist. Capture of all data, particularly the  
13 functional outcome assessments and CT scan analysis, will be conducted by persons  
14 who are blinded to the results of the two biomarkers.  
15  
16  
17  
18  
19  
20  
21  
22  
23  
24  
25

### 26 **Data analysis: CT scan**

27  
28 Brain CT scans are performed as part of the patient standard of care and uploaded to  
29 a secure web central database (SHANOIR-INRIA) for archive and central analysis.  
30 CT scan findings are classified as CT-negative or CT-positive by the local and one  
31 central reading. In case of disagreement between them, an additional central CT-  
32 reading will be performed by a third radiologist for final adjudication. The criteria for  
33 CT positivity are crucial because the primary objective is related to the CT results  
34 (positive/negative). Criteria for CT-positive findings are as follows: a CT scan  
35 classified as type II or greater according to the Traumatic Coma Databank (TCDB)  
36 classification (range I-V), or a CT scan with the presence of the following lesions: a)  
37 epidural haematoma, b) subdural haematoma, c) subarachnoid haemorrhage, d)  
38 intraventricular haemorrhage, e) contusion, f) petechial haemorrhage or g) any  
39 finding related to diffuse axonal injury (DAI) and depressed skull fracture. Linear skull  
40 fractures will be recorded but not used for the definition of CT positive lesions.  
41  
42  
43  
44  
45  
46  
47  
48  
49  
50  
51

### 52 **Data analysis: biomarkers**

53  
54 The 10-ml blood sample will be centrifuged without delay and frozen at -80°C. Serum  
55 samples will be transferred to the central storage facility (bioMérieux R&D BioBank,  
56 Marcy l'Étoile, France). All measurement procedures will be conducted independently  
57  
58  
59  
60

1  
2  
3 based on the clinical and CT-status of the patients. The samples will be batch-  
4 analysed using fully automated instruments (VIDAS® 3, bioMérieux) with kits to  
5 detect the serum concentrations of UCH-L1 and GFAP.  
6  
7  
8  
9  
10

### 11 **Statistical considerations**

12  
13 We formulate the hypothesis that the automated assay measuring the serum  
14 concentrations of GFAP and UCH-L1 will have a sensitivity of at least 97% and an  
15 NPV of at least 99% to rule out the need for CT scan with accuracy. Assuming a  
16 prevalence of 11% of positive brain CT scans, the enrolment of 176 patients with  
17 positive CT-scans and 1424 patients with negative CT-scans is required to achieve  
18 these indices of performance. . Assuming a 10% rate of loss to follow-up, the study  
19 recruitment target is set to 1760 patients in France and in Spain.  
20  
21  
22  
23  
24  
25

26 For the primary objective, the previously published cut-off values for GFAP and UCH-  
27 L1 will be externally validated with respect to the CT scan findings. The levels of  
28 GFAP and UCH-L1 obtained with the VIDAS BTI will also be analysed according to  
29 the neurological outcome, the presence of posttraumatic symptoms and quality of life  
30 (secondary objective). To test whether these biomarkers are independent prognostic  
31 factors, multivariable analysis will be conducted using logistic regression for  
32 dichotomized values and linear regression for quantitative values. In addition,  
33 prediction models will be developed to assess the contribution of biomarkers to  
34 existing diagnostic and prognostic tools.  
35  
36  
37  
38  
39  
40  
41  
42  
43  
44  
45  
46  
47

### 48 **ETHICS AND DISSEMINATION**

49 Ethics approval was obtained from the CEIm (Comité Ético de Investigación Clínica)  
50 of Hospital 12 de Octubre on 20 July 2019, Madrid (Re#19/322) and the study started  
51 in August 2019. In France, the protocol was approved by the Institutional Review  
52 Board of Sud-Ouest Outre Mer III on 14 November 2019 (Re#2019-A01525-52). The  
53 study began in France in Grenoble on 29 November 2019. The National Commission  
54 on Informatics and Liberty (France) gave its approval on 31 January 2020  
55 (Re#919443).  
56  
57  
58  
59  
60

1  
2  
3 The results of this study will be presented at national and international meetings  
4 and published in peer-reviewed journals. Patients will not be individually notified  
5 regarding the results of the study. The principal publication from the study will be in  
6 the name of the BRAINI investigators with full credit assigned to all active,  
7 collaborating investigators, research coordinators and institutions.  
8  
9  
10  
11  
12  
13  
14

## 15 **DISCUSSION**

16  
17 The protocol and future results of the current study should be analysed taking  
18 into account previously published data. In the large CENTER-TBI cohort study, the  
19 addition of serum GFAP, measured within 24 h following mTBI was found to improve  
20 the prediction of CT abnormalities [18]. Although the combination of GFAP and  
21 UCH-L1 did not enhance this performance, compared to GFAP alone [18], it should  
22 be noted that GFAP and UCH-L1 were measured within 24-h after TBI using a  
23 research-use only (RUO) assay with poor agreement between replicates of  
24 biomarker assessments. The present study will evaluate the diagnostic accuracy of  
25 the combination of GFAP and UCH-L1, measured within 12 hours post-TBI, using an  
26 automated Vidas IVD-platform. In addition, an external validation of the cut-off values  
27 for these two biomarkers will be performed. Finally, GFAP and UCH-L1 will be  
28 assessed regarding their possible prediction of mid-term neurological outcome and  
29 quality of life.  
30  
31  
32  
33  
34  
35  
36  
37  
38  
39

40 There are some limitations with the BRAINI protocol. First, variability in mTBI  
41 management and CT ordering may be expected in Spain, as there is no consensus  
42 regarding clinical decision rules for ordering CT, and inter-centre differences may  
43 exist in France as well. This may in turn influence the CT-positive prevalence across  
44 the sites. Second, differences might occur between local and central CT readings. To  
45 mitigate this risk, an additional independent central CT reading will be performed for  
46 final adjudication. Third, only mTBI patients with brain CT scans will be included in  
47 this study. Patients discharged from the ED following clinical examination without CT  
48 scan will not be included; therefore, their GFAP and UCH-L1 concentrations will not  
49 be captured. As a consequence, the value of GFAP and UCH-L1 in all TBI  
50 presentations will not be determined.  
51  
52  
53  
54  
55  
56  
57  
58  
59  
60

**REFERENCES**

- 1 Teasdale G, Jennett B. ASSESSMENT OF COMA AND IMPAIRED CONSCIOUSNESS: A Practical Scale. *Lancet* 1974;**304**:81–4. doi:10.1016/S0140-6736(74)91639-0
- 2 Levin HS, Diaz-Arrastia RR. Diagnosis, prognosis, and clinical management of mild traumatic brain injury. *Lancet Neurol.* 2015;**14**:506–17. doi:10.1016/S1474-4422(15)00002-2
- 3 Gomez PA, Lobato RD, Lagares A, *et al.* Mild head injury in adults. A review. *Neurocirugia* 2000;**11**.
- 4 Gómez PA, Lobato RD, Ortega JM, *et al.* Mild head injury: Differences in prognosis among patients with a Glasgow Coma Scale score of 13 to 15 and analysis of factors associated with abnormal CT findings. *Br J Neurosurg* 1996;**10**:453–60. doi:10.1080/02688699647078
- 5 Haydel MJ, Preston CA, Mills TJ, *et al.* Indications for Computed Tomography in Patients with Minor Head Injury. *N Engl J Med* 2000;**343**:100–5. doi:10.1056/NEJM200007133430204
- 6 Stiell IG, Wells GA, Vandemheen K, *et al.* The Canadian CT Head Rule for patients with minor head injury. *Lancet* 2001;**357**:1391–6. doi:10.1016/S0140-6736(00)04561-X
- 7 Jehlé E, Honnart D, Grasleguen C, *et al.* Traumatisme crânien léger (score de Glasgow de 13 à 15): Triage, évaluation, examens complémentaires et prise en charge précoce chez le nouveau-né, l'enfant et l'adulte. *Ann Fr Med d'Urgence* 2012;**2**:199–214. doi:10.1007/s13341-012-0202-4
- 8 Melnick ER, Szlezak C, Bentley S, *et al.* CT Overuse for Mild Traumatic Brain Injury. *Jt Comm J Qual Patient Saf* 2012;**38**:483–9.
- 9 Undén J, Ingebrigtsen T, Romner B. Scandinavian guidelines for initial management of minimal, mild and moderate head injuries in adults: An evidence and consensus-based update. *BMC Med* 2013;**11**:50. doi:10.1186/1741-7015-11-50
- 10 Papa L, Brophy GM, Welch RD, *et al.* Time course and diagnostic accuracy of

- 1  
2  
3 glial and neuronal blood biomarkers GFAP and UCH-L1 in a large cohort of  
4 trauma patients with and without mild traumatic brain injury. *JAMA Neurol*  
5 2016;**73**:551–60. doi:10.1001/jamaneurol.2016.0039  
6  
7  
8  
9 11 Diaz-Arrastia R, Wang KKW, Papa L, *et al*. Acute biomarkers of traumatic brain  
10 injury: Relationship between plasma levels of ubiquitin C-terminal hydrolase-l1  
11 and glial fibrillary acidic protein. *J Neurotrauma* 2014;**31**:19–25.  
12 doi:10.1089/neu.2013.3040  
13  
14  
15  
16 12 Bazarian JJ, Biberthaler P, Welch RD, *et al*. Serum GFAP and UCH-L1 for  
17 prediction of absence of intracranial injuries on head CT (ALERT-TBI): a  
18 multicentre observational study. *Lancet Neurol* 2018;**17**:782–9.  
19 doi:10.1016/S1474-4422(18)30231-X  
20  
21  
22  
23  
24 13 Banyan BTI Package Insert.  
25 [http://banyanbio.com/assets/files/BanyanBTI\\_IFU\\_700027\\_v1.pdf](http://banyanbio.com/assets/files/BanyanBTI_IFU_700027_v1.pdf) (accessed 1  
26 Jun 2020).  
27  
28  
29  
30 14 Maas AIR, Lingsma HF. ALERT-TBI study on biomarkers for TBI: has science  
31 suffered? *Lancet Neurol* 2018;**17**:737–8. doi:10.1016/S1474-4422(18)30275-8  
32  
33  
34 15 Gill J, Latour L, Diaz-Arrastia R, *et al*. Glial fibrillary acidic protein elevations  
35 relate to neuroimaging abnormalities after mild TBI. *Neurology* 2018;**91**:E1385–  
36 9. doi:10.1212/WNL.00000000000006321  
37  
38  
39  
40 16 Shahjouei S, Sadeghi-Naini M, Yang Z, *et al*. The diagnostic values of UCH-L1  
41 in traumatic brain injury: A meta-analysis. *Brain Inj.* 2018;**32**:1–17.  
42 doi:10.1080/02699052.2017.1382717  
43  
44  
45  
46 17 Yue JK, Yuh EL, Korley FK, *et al*. Association between plasma GFAP  
47 concentrations and MRI abnormalities in patients with CT-negative traumatic  
48 brain injury in the TRACK-TBI cohort: a prospective multicentre study. *Lancet*  
49 *Neurol* 2019;**18**:953–61. doi:10.1016/S1474-4422(19)30282-0  
50  
51  
52  
53 18 Czeiter E, Amrein K, Gravesteijn BY, *et al*. Blood biomarkers on admission in  
54 acute traumatic brain injury: Relations to severity, CT findings and care path in  
55 the CENTER-TBI study. *EBioMedicine* 2020;**56**.  
56 doi:10.1016/j.ebiom.2020.102785  
57  
58  
59  
60

- 1  
2  
3 19 von Steinbüchel N, Wilson L, Gibbons H, *et al.* Quality of Life after Brain Injury  
4 (QOLIBRI): scale validity and correlates of quality of life. *J Neurotrauma*  
5 2010;**27**:1157–65. doi:10.1089/neu.2009.1077  
6  
7  
8  
9 20 Castaño-León AM, Navarro-Main B, Gomez PA, *et al.* Quality of Life After Brain  
10 Injury: Psychometric Properties of the Spanish Translation of the QoLIBRI. *Eval*  
11 *Heal Prof* 2018;**41**. doi:10.1177/0163278717702696  
12  
13  
14  
15 21 Jourdan C, Bayen E, Pradat-Diehl P, *et al.* A comprehensive picture of 4-year  
16 outcome of severe brain injuries. Results from the Paris-TBI study. *Ann Phys*  
17 *Rehabil Med* 2016;**59**:100–6. doi:10.1016/j.rehab.2015.10.009  
18  
19  
20  
21 22 Wilson JTL, Pettigrew LEL, Teasdale GM. Structured interviews for the  
22 glasgow outcome scale and the extended glasgow outcome scale: Guidelines  
23 for their use. *J. Neurotrauma*. 1998;**15**:573–80. doi:10.1089/neu.1998.15.573  
24  
25  
26 23 Teasdale GM, Pettigrew LEL, Wilson JTL, *et al.* Analyzing outcome of  
27 treatment of severe head injury: A review and update on advancing the use of  
28 the Glasgow outcome scale. *J. Neurotrauma*. 1998;**15**:587–97.  
29 doi:10.1089/neu.1998.15.587  
30  
31  
32  
33  
34 24 Herdman M, Gudex C, Lloyd A, *et al.* Development and preliminary testing of  
35 the new five-level version of EQ-5D (EQ-5D-5L). *Qual Life Res* 2011;**20**:1727–  
36 36. doi:10.1007/s11136-011-9903-x  
37  
38  
39  
40 25 King NS, Crawford S, Wenden FJ, *et al.* The Rivermead Post Concussion  
41 Symptoms Questionnaire: a measure of symptoms commonly experienced  
42 after head injury and its reliability. *J Neurol* 1995;**242**:587–92.  
43 doi:10.1007/BF00868811  
44  
45  
46  
47  
48  
49  
50  
51  
52  
53  
54  
55  
56  
57  
58  
59  
60



**Author's contribution:** MR, AL, VB, JDC, OM, VP and JFP initiated the study design, wrote the study protocol and drafted the manuscript. All are part of the steering committee of the study. All authors attest to have significantly contributed to refinement of the study protocol and approved the final manuscript. All members of BRAINI contributed to the design and application of the protocol.

**The following are BRAINI investigators:** Maxime Maignane<sup>6</sup>, Laurent Jacquin<sup>7</sup>, Marion Douplat<sup>8</sup>, Said Laribi<sup>9</sup>, Philippe Pes<sup>10</sup>, Patrick Ray<sup>11</sup>, Jérémy Guenezan<sup>12</sup>, Mustapha Sebbane<sup>13</sup>, Frédéric Balen<sup>14</sup>, Guillaume Durand<sup>15</sup>, Cordelia Abric<sup>16</sup>, Podaru Mihai<sup>17</sup>, Julian Morales<sup>18</sup>, Ana Castuera<sup>18</sup>, Mariana Garcia Ponce<sup>19</sup>, Maite Cuesta<sup>19</sup>

<sup>6</sup> Emergency Department, University Hospital, Grenoble, France; <sup>7</sup> Hospices Civils of Lyon, Emergency department, Edouard Herriot Hospital, Lyon, France ; <sup>8</sup> Hospices Civils de Lyon, Emergency Department, Lyon, France; <sup>9</sup> Department of Emergency Medicine, Tours University Hospital, Tours, France; <sup>10</sup> Department of Emergency Medicine, University Hospital of Nantes, Nantes, France; <sup>11</sup> Emergency Department, University Hospital of Dijon Bourgogne, Dijon CEDEX, France; <sup>12</sup> CHU de Poitiers, Service des Urgences et SAMU 86, Poitiers, France, Université de Poitiers, Faculté de Médecine et de Pharmacie de Poitiers, Poitiers, France; <sup>13</sup> Department of Emergency Medicine and Prehospital Care, Montpellier University Hospital, Montpellier, France; <sup>14</sup> Emergency Department, Toulouse University Hospital, Toulouse, France; <sup>15</sup> Hôpital Nord-Ouest Villefranche sur Saône, France; <sup>16</sup> CH Annecy Genevois, France; <sup>17</sup> Servicio de Urgencias, Hospital Universitario del Tajo, Madrid, España; <sup>18</sup> Servicio de Urgencias, Hospital Universitario Gregorio Marañón, Madrid, España; <sup>19</sup> Servicio de Neurocirugía, Instituto de Investigación imas 12, Hospital Universitario 12 de Octubre, Madrid, España.

**Funding:** This study is supported by a grant from the European Institute of Innovation and Technology (EIT) Health (BP 2019-2020). EIT Health is supported by EIT, a body of the European Union.

**Competing interests:** VB, OM and VP are employees of bioMérieux.



1  
2  
3  
4  
5  
6  
7  
8  
9  
10  
11  
12  
13  
14  
15  
16  
17  
18  
19  
20  
21  
22  
23  
24  
25  
26  
27  
28  
29  
30  
31  
32  
33  
34  
35  
36  
37  
38  
39  
40  
41  
42  
43  
44  
45  
46  
47  
48  
49  
50  
51  
52  
53  
54  
55  
56  
57  
58  
59  
60

**Study status:** Recruitment started in August 2019. Study completion is planned in June 2021.

For peer review only

## Figure Legend

Fig. 1. Study design and flow of the BRAINI study.

For peer review only

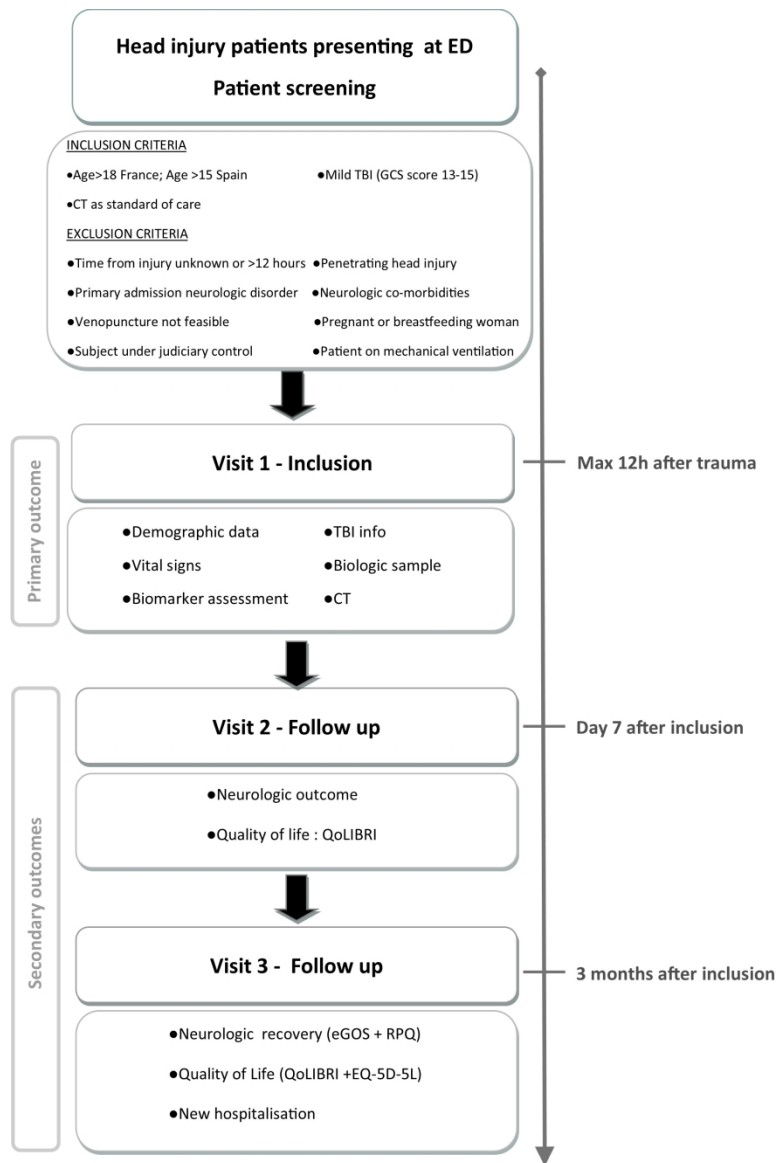

Figure 1. Study design and flow of the BRAINI study.

656x927mm (96 x 96 DPI)

# BMJ Open

## A study protocol for investigating the performance of an automated blood test measuring GFAP and UCH-L1 in a prospective observational cohort of patients with mild Traumatic BRAIN Injury: European BRAINI study

|                                 |                                                                                                                                                                                                                                                                                                                                                                                                                                                                                                                                                                                                                                                                                                                                                                                                     |
|---------------------------------|-----------------------------------------------------------------------------------------------------------------------------------------------------------------------------------------------------------------------------------------------------------------------------------------------------------------------------------------------------------------------------------------------------------------------------------------------------------------------------------------------------------------------------------------------------------------------------------------------------------------------------------------------------------------------------------------------------------------------------------------------------------------------------------------------------|
| Journal:                        | <i>BMJ Open</i>                                                                                                                                                                                                                                                                                                                                                                                                                                                                                                                                                                                                                                                                                                                                                                                     |
| Manuscript ID                   | bmjopen-2020-043635.R1                                                                                                                                                                                                                                                                                                                                                                                                                                                                                                                                                                                                                                                                                                                                                                              |
| Article Type:                   | Protocol                                                                                                                                                                                                                                                                                                                                                                                                                                                                                                                                                                                                                                                                                                                                                                                            |
| Date Submitted by the Author:   | 02-Nov-2020                                                                                                                                                                                                                                                                                                                                                                                                                                                                                                                                                                                                                                                                                                                                                                                         |
| Complete List of Authors:       | Richard, Marion; Universite Grenoble Alpes, Department of Anaesthesia and Intensive Care, Centre Hospitalier Universitaire Grenoble Alpes, Grenoble Institut des Neurosciences, INSERM, U1216, 38000 Lagares, Alfonso; Hospital Universitario 12 de Octubre Servicio de Neurocirugia, imas12; Universidad Complutense de Madrid, Surgery Bondanese, Victor; bioMerieux SA, Clinical Unit de la Cruz, Javier; Instituto de investigación imas12, Hospital Universitario 12 de Octubre, SAMID Mejan, Odile; bioMerieux SA, Clinical Unit Pavlov, Vladislav; bioMerieux SA, Medical Affairs Payen, Jean-François ; Universite Grenoble Alpes, Department of Anaesthesia and Intensive Care, Centre Hospitalier Universitaire Grenoble Alpes, Grenoble Institut des Neurosciences, INSERM, U1216, 38000 |
| <b>Primary Subject Heading</b>: | Emergency medicine                                                                                                                                                                                                                                                                                                                                                                                                                                                                                                                                                                                                                                                                                                                                                                                  |
| Secondary Subject Heading:      | Emergency medicine, Diagnostics, Neurology                                                                                                                                                                                                                                                                                                                                                                                                                                                                                                                                                                                                                                                                                                                                                          |
| Keywords:                       | ACCIDENT & EMERGENCY MEDICINE, NEUROSURGERY, TRAUMA MANAGEMENT, Computed tomography < RADIOLOGY & IMAGING                                                                                                                                                                                                                                                                                                                                                                                                                                                                                                                                                                                                                                                                                           |
|                                 |                                                                                                                                                                                                                                                                                                                                                                                                                                                                                                                                                                                                                                                                                                                                                                                                     |

SCHOLARONE™  
Manuscripts



I, the Submitting Author has the right to grant and does grant on behalf of all authors of the Work (as defined in the below author licence), an exclusive licence and/or a non-exclusive licence for contributions from authors who are: i) UK Crown employees; ii) where BMJ has agreed a CC-BY licence shall apply, and/or iii) in accordance with the terms applicable for US Federal Government officers or employees acting as part of their official duties; on a worldwide, perpetual, irrevocable, royalty-free basis to BMJ Publishing Group Ltd ("BMJ") its licensees and where the relevant Journal is co-owned by BMJ to the co-owners of the Journal, to publish the Work in this journal and any other BMJ products and to exploit all rights, as set out in our [licence](#).

The Submitting Author accepts and understands that any supply made under these terms is made by BMJ to the Submitting Author unless you are acting as an employee on behalf of your employer or a postgraduate student of an affiliated institution which is paying any applicable article publishing charge ("APC") for Open Access articles. Where the Submitting Author wishes to make the Work available on an Open Access basis (and intends to pay the relevant APC), the terms of reuse of such Open Access shall be governed by a Creative Commons licence – details of these licences and which [Creative Commons](#) licence will apply to this Work are set out in our licence referred to above.

Other than as permitted in any relevant BMJ Author's Self Archiving Policies, I confirm this Work has not been accepted for publication elsewhere, is not being considered for publication elsewhere and does not duplicate material already published. I confirm all authors consent to publication of this Work and authorise the granting of this licence.

1  
2  
3  
4  
5  
6  
7  
8  
9  
10  
11

## **A study protocol for investigating the performance of an automated blood test measuring GFAP and UCH-L1 in a prospective observational cohort of patients with mild Traumatic BRAIN Injury: European BRAINI study**

12 Marion Richard<sup>1</sup>, Alfonso Lagares<sup>2</sup>, Victor Bondanese<sup>3</sup>, Javier De la Cruz<sup>4</sup>, Odile  
13 Mejan<sup>3</sup>, Vladislav Pavlov<sup>5</sup>, Jean-François Payen<sup>1</sup>, BRAINI Investigators

14  
15  
16 <sup>1</sup> Univ. Grenoble Alpes, Department of Anaesthesia and Intensive Care, Centre  
17 Hospitalier Universitaire Grenoble Alpes, Grenoble Institut des Neurosciences,  
18 INSERM, U1216, 38000 Grenoble, France

19  
20  
21 <sup>2</sup> Servicio de Neurocirugía, Hospital Universitario 12 de Octubre, Universidad  
22 Complutense de Madrid, Instituto de Investigación imas12, Madrid, Spain

23  
24 <sup>3</sup> bioMérieux, Clinical Unit, Chemin de l'Orme, 69280 Marcy l'Etoile, France

25  
26  
27 <sup>4</sup> Instituto de Investigación imas12, Hospital Universitario 12 de Octubre, SAMID  
28 Madrid, Spain

29  
30  
31 <sup>5</sup> bioMérieux, Medical Affairs, Chemin de l'Orme, 69280 Marcy l'Etoile, France

32  
33  
34  
35  
36  
37  
38  
39  
40  
41  
42

### **Corresponding Author:**

43  
44  
45  
46  
47  
48  
49  
50  
51  
52  
53  
54  
55  
56  
57  
58  
59  
60

**Prof. Alfonso Lagares**, Servicio de Neurocirugía, Hospital Universitario 12 de Octubre, Universidad Complutense de Madrid, Instituto de Investigación imas12, Madrid, Spain. Avda de Cordoba s/n, Madrid 28041. Email: [alfonlag@ucm.es](mailto:alfonlag@ucm.es)

## ABSTRACT

**Introduction:** Mild traumatic brain injury (mTBI) is a common cause of clinical consultation in the Emergency Department. Patients with mTBI may undergo brain CT scans based on clinical criteria. However, the proportion of patients with brain lesions on CT is very low. Two serum biomarkers, glial fibrillary acidic protein (GFAP) and ubiquitin carboxy-terminal hydrolase L1 (UCH-L1), have been shown to discriminate patients regarding the presence or absence of brain lesions on initial CT scan when assessed within the first 12 hours after TBI. However, the current technique for measuring serum concentrations of GFAP and UCH-L1 is manual and time consuming, which may hinder its use in routine clinical practice. This study assesses the diagnostic accuracy of an automated assay for the measurement of serum GFAP and UCH-L1 in a cohort of mTBI patients who received a CT scan as the standard of care.

**Methods and analysis:** This is a prospective multicentre observational study of 1760 mTBI patients recruited in France and Spain across 16 participating sites. Adult patients with an initial Glasgow Coma Scale score of 13-15 and a brain CT-scan underwent blood sampling within 12 hours after TBI. The primary outcome measure is the diagnostic performance of an automated assay measuring serum concentrations of GFAP and UCH-L1 for discriminating between patients with positive and negative findings on brain CT-scans. Secondary outcome measures include the performance of these two biomarkers in predicting the neurological status and quality of life at 1 week and 3 months after the trauma.

**Ethics and dissemination:** Ethics approval was obtained by the Institutional Review Board of Sud-Ouest Outre Mer III in France (Re#2019-A01525-52) and Hospital 12 de Octubre in Spain (Re#19/322). The results will be presented at scientific meetings and published in peer-reviewed publications.

**Trial registration number (ClinicalTrials.gov):** NCT04032509

**Key words:** Traumatic brain injury, biomarkers, diagnostic techniques and procedures, GFAP, UCH-L1, serum, computerized tomography, prognosis.

## STRENGTHS AND LIMITATIONS OF THE STUDY

- This is a large prospective multicentre study to validate the value of serum biomarkers GFAP and UCH-L1 in predicting brain CT-scan findings after mTBI.
- The additional value of these two biomarkers will be assessed regarding neurological outcome and quality of life.
- Variability in the management of mTBI patients and in the indications of CT-scans may influence the rate of positive CT scans in the different participating centres, which may have an impact on the statistical power of the study.



## INTRODUCTION

Mild traumatic brain injury (mTBI), as defined by a Glasgow Coma Scale (GCS) score of 13-15 [1], represents a frequent admission in the Emergency Department (ED) [2–4]. The initial management includes a non-contrast brain computed tomography (CT) scan if the patient meets specific conditions. However, the prevalence of CT-detected abnormalities is less than 10% among mTBI patients, and less than 1% of them will require neurosurgical procedures. Efforts have been made for decades to optimize the indications for brain CT scans after mTBI such as the New Orleans Criteria [5] and Canadian Head CT Rule [6] as well as national guidelines such as the French guidelines [7]. However, a certain variability exists among physicians regarding CT scan indications and some situations post-TBI may be confusing, e.g. intoxicated patients or patients with hearing loss or speech disturbances. As a consequence, up to 40% of CT scans prescribed in EDs would actually do not follow guideline recommendations [8], reflecting a substantial CT overuse.

Clinical decision rules for initial CT scan can be optimized with the use of an objective parameter that is easily and rapidly assessed. This could be achieved using blood concentrations of brain-damage biomarkers. Among candidates, serum protein S100B is the only biomarker used in Europe. The Scandinavian guidelines for the initial management of mild and moderate head injuries in adults provide recommendations for the use of S100B to rule out the need for head CT in mTBI. Multicentre validation of Scandinavian Guidelines is currently in progress in Sweden (\**ClinicalTrials.gov*, 2017, NCT03280485). Unfortunately, the blood concentration of S100B can be affected by several factors such as multiple trauma, skin colour, presence of melanomas, and its clinical utility is limited by the short half-life (3h) of S100B in blood [9].

Recently, serum levels of ubiquitin carboxy-terminal hydrolase-L1 (UCH-L1) and glial fibrillary acidic protein (GFAP), two brain-specific proteins, were found to be elevated in patients with intracranial lesions visible on CT scans [10,11]. Data from the ALERT-TBI trial showed that serum GFAP and UCH-L1 protein concentrations are able to reliably predict the absence of clinically relevant lesions on CT scan in patients with mTBI [12]. The Banyan Brain Trauma Indicator (*Banyan BTI™ Package Insert*) has obtained FDA-clearance in February 2018. This is a manual immunoassay that measures GFAP and UCH-L1 serum concentrations with a

1  
2  
3 sensitivity (95% lower confidence limit) and negative predictive value (95% lower  
4 confidence limit) of 97.5% (93.7%) and 99.6% (98.8%), respectively[13]. However,  
5 the manual ELISA technique takes 4 hours to provide results, which is too long for  
6 mTBI triage in the ED setting. In addition, the cut-offs used in the ALERT-TBI trial  
7 need to be externally validated [12,14].  
8  
9

10  
11  
12 A faster *in vitro* diagnostic (IVD) technique is then required for a possible use in  
13 clinical practice, together with an external validation of the diagnostic accuracy of  
14 GFAP and UCH-L1 in mTBI patients [15–18]. Automated assays assessing serum  
15 concentrations of GFAP and UCH-L1 have been developed on the VIDAS® platform  
16 (bioMérieux, Marcy l’Etoile, France). The primary objective of the study is to evaluate  
17 the diagnostic performance of the VIDAS® GFAP and VIDAS® UCHL-1 assays in a  
18 prospective multicentre cohort of mTBI patients with respect to their brain CT scan  
19 findings. The secondary objectives are to assess the ability of the two biomarkers to  
20 predict the neurological status and quality of life at 1 week and 3 months after mTBI.  
21  
22  
23  
24  
25  
26  
27  
28  
29  
30

## 31 **METHODS AND ANALYSIS**

### 32 **Study design**

33  
34 BRAINI is a prospective, multicentre, observational study in France and Spain.  
35  
36  
37  
38

### 39 **Study setting**

40  
41 BRAINI includes 12 sites in France within university hospitals (Grenoble, Lyon  
42 Edouard-Herriot, Lyon-Sud, Tours, Nantes, Dijon, Poitiers, Montpellier, Toulouse and  
43 Bordeaux) and non-university hospitals (Annecy and Villefranche-sur-Saone) and 4  
44 sites in Madrid, Spain, including University Hospital 12 de Octubre, University  
45 Hospital Gregorio Marañón, Hospital del Tajo and Hospital de La Princesa. Each  
46 centre was chosen based on documentation with regard to patient availability and  
47 experience in mild TBI patient management.  
48  
49  
50  
51  
52  
53  
54

### 55 **Study population**

56  
57 Patients will be included if they meet the following criteria: age >18 years (France)  
58 and > 15 years old (Spain), admitted for a mild TBI with GCS score 13-15, requiring  
59  
60

1  
2  
3 brain CT scan as part of standard of care according to the French guidelines [7] or to  
4 the in-charge physician in Spain, and 10-mL blood sample obtained as part of routine  
5 blood samples within 12 hours after injury.  
6  
7

8  
9 Patients will be excluded if they have at least one of the following criteria: GCS score  
10 3-12 on admission; time of injury unknown; time since injury exceeding 12 hours;  
11 primary admission for non-traumatic neurological disorder (e.g., stroke, spontaneous  
12 intracranial hematoma); penetrating head injury; mechanical ventilation;  
13 neuropsychiatric and neurologic co-morbidities that might interfere with the  
14 assessment of outcomes at 1 week and 3 months; venepuncture not feasible; no  
15 brain CT scan; subject under judiciary control; pregnant or breastfeeding woman; or  
16 participation in another therapeutic study.  
17  
18

19 Patients will be included after verification of the eligibility criteria. In France patient  
20 non-opposition to participate in the study must be documented. In Spain written  
21 informed consent will be obtained, before inclusion in the study, from the patient or  
22 next of kin if the patient is not in condition of giving consent.  
23  
24  
25  
26  
27  
28  
29

### 30 31 **Study outcomes**

32  
33 The primary outcome measure is the performance of the VIDAS® GFAP and  
34 VIDAS® UCHL-1 assays in terms of sensitivity, specificity, positive predictive value  
35 (PPV), negative predictive value (NPV) and their corresponding lower limit of the 95%  
36 confidence interval with respect to brain CT scan findings, i.e., positive vs. negative  
37 (see below).  
38  
39

40  
41  
42 Secondary outcomes are measured at 1 week and 3 months post-TBI and include  
43 neurological status, i.e., stable or degraded condition, and quality of life assessed  
44 using the QOLIBRI questionnaire (quality of life after TBI) [19–21] at 1 week. At 3  
45 months post-TBI, patients will be assessed according to the Extended Glasgow  
46 Outcome Scale (GOSE) [22,23], the 5-level EQ-5D version [24], the QOLIBRI scale,  
47 and the Rivermead Post-concussion Symptoms Questionnaire (RPQ) [25]. The study  
48 design and flow is shown in Fig.1.  
49  
50  
51  
52  
53  
54  
55

### 56 57 **Data collection and data monitoring**

58 At each participating site, data will be collected and entered into the web-based  
59 electronic CRF (eCRF) (Medsharing, Fontenay-sous-Bois, France) by clinical  
60

1  
2  
3 research associates under the supervision of the site principal investigators. The  
4 study database will be created from the eCRF. Trained research coordinators will  
5 monitor the data collection. The study will collect demographic and baseline  
6 information at admission, the reason to prescribe brain CT scan and immediate CT  
7 findings by the local radiologist, biological data if indicated by the in-charge  
8 physician, a 10-ml study-specific blood sample within 12 hours after trauma, and  
9 functional outcomes at 1 week and 3 months. At one week post-TBI, clinical research  
10 associates will transmit information regarding the neurological status of the patients  
11 to the coordinating centres (University Hospital Grenoble Alpes and University  
12 Hospital 12 de Octubre, Madrid). Questionnaires at 3 months will be conducted by  
13 trained central outcome assessors during a structured telephone interview.  
14 Anonymized data from brain CT images will be transferred to a centralized platform  
15 to be evaluated by a trained neuroradiologist. Capture of all data, particularly the  
16 functional outcome assessments and CT scan analysis, will be conducted by persons  
17 who are blinded to the results of the two biomarkers.  
18  
19  
20  
21  
22  
23  
24  
25  
26  
27  
28  
29  
30

### 31 **Data analysis: CT scan**

32  
33 Brain CT scans are performed as part of the patient standard of care and uploaded to  
34 a secure web central database (SHANOIR-INRIA) for archive and central analysis.  
35 CT scan findings are classified as CT-negative or CT-positive by the local and one  
36 central reading. In case of disagreement between them, an additional central CT-  
37 reading will be performed by a third radiologist for final adjudication. The criteria for  
38 CT positivity are crucial because the primary objective is related to the CT results  
39 (positive/negative). Criteria for CT-positive findings are as follows: a CT scan  
40 classified as type II or greater according to the Traumatic Coma Databank (TCDB)  
41 classification (range I-V), or a CT scan with the presence of the following lesions: a)  
42 epidural haematoma, b) subdural haematoma, c) subarachnoid haemorrhage, d)  
43 intraventricular haemorrhage, e) contusion, f) petechial haemorrhage or g) any  
44 finding related to diffuse axonal injury (DAI) and depressed skull fracture. Linear skull  
45 fractures will be recorded but not used for the definition of CT positive lesions.  
46  
47  
48  
49  
50  
51  
52  
53  
54  
55  
56  
57  
58  
59  
60

## Data analysis: biomarkers

The 10-ml blood sample for determination of biomarkers will be collected using gel-separator tubes and allowed to clot for 30 minutes at room temperature (18-25°C) and then centrifuged at 2000G for 15 minutes. Serum will be aliquoted to 1ml cryovials, frozen and stored at -80°C within two hours of the extraction until shipment on dry ice to the central storage facility (bioMérieux R&D bioBank, Marcy l'Étoile, France). All measurement procedures will be conducted independently based on the clinical and CT-status of the patients. The samples will be batch-analysed using fully automated instruments (VIDAS®, bioMérieux) with kits to detect the serum concentrations of UCH-L1 and GFAP.

bioMérieux will perform analytical performance according to Clinical & Laboratory Standards Institute (CLSI) guidelines including precision study, i.e. repeatability and reproducibility of the assays. In the absence of reference standard and reference measurement procedure for GFAP and UCH-L1, the VIDAS® assays will be traceable to an internal standard. The metrological traceability chain defined in accordance with the standard ISO 17511 will ensure the GFAP and UCH-L1 values assigned to calibrators, product calibrator and patient samples.

## Statistical considerations

The Banyan BTI™ test for which Bayan biomarkers got FDA clearance is the only IVD reference assay for GFAP and UCHL-1 so far. It will be used as the reference for the VIDAS® GFAP and VIDAS® UCHL-1 assays.

We formulate the hypothesis that the automated assay measuring the serum concentrations of GFAP and UCH-L1 will have a sensitivity of at least 97% and an NPV of at least 99% to rule out the need for CT scan with accuracy. Assuming a prevalence of 11% of positive brain CT scans, the enrolment of 176 patients with positive CT-scans and 1424 patients with negative CT-scans is required to achieve these indices of performance. . Assuming a 10% rate of loss to follow-up, the study recruitment target is set to 1760 patients in France and in Spain.

1  
2  
3 Cut-off values for UCH-L1 (327 pg/ml) and GFAP (22 pg/ml) applied in the ALERT-  
4 TBI study were fixed for the Banyan BTI™ [12]. We will verify the predictive  
5 performances of UCH-L1 and GFAP measured on the VIDAS® instrument with these  
6 predefined cut-off values. An analysis on whether alternative cut-offs could provide  
7 better performance with the VIDAS® BTI, will also be performed based on BRAINI  
8 study data. A method comparison between Banyan BTI™ and VIDAS® BTI will be  
9 performed and will contribute to optimal cut-offs selection.

10  
11  
12  
13  
14  
15  
16 The distribution of biomarker levels will be analysed by age, gender and other  
17 predictors. As a secondary objective, the levels of GFAP and UCH-L1 obtained with  
18 the VIDAS® assays will also be analysed according to the neurological outcome, the  
19 presence of posttraumatic symptoms and quality of life (secondary objective). To test  
20 whether these biomarkers are independent prognostic factors, multivariable analysis  
21 will be conducted using logistic regression for dichotomized variables and linear  
22 regression for quantitative variables. In addition, prediction models will be developed  
23 to assess the contribution of biomarkers to existing diagnostic and prognostic tools.

### 31 32 **Patient and public involvement**

33  
34  
35 No patient involved.

### 36 37 38 39 **ETHICS AND DISSEMINATION**

40  
41  
42 Ethics approval was obtained from the CEIm (Comité Ético de Investigación Clínica)  
43 of Hospital 12 de Octubre on 20 July 2019, Madrid (Re#19/322) and the study started  
44 in August 2019. In France, the protocol was approved by the Institutional Review  
45 Board of Sud-Ouest Outre Mer III on 14 November 2019 (Re#2019-A01525-52). The  
46 study began in France in Grenoble on 29 November 2019. The National Commission  
47 on Informatics and Liberty (France) gave its approval on 31 January 2020  
48 (Re#919443).

49  
50  
51  
52  
53  
54  
55 The results of this study will be presented at national and international meetings  
56 and published in peer-reviewed journals. Patients will not be individually notified  
57 regarding the results of the study. The principal publication from the study will be in  
58  
59  
60



1  
2  
3 the name of the BRAINI investigators with full credit assigned to all active,  
4 collaborating investigators, research coordinators and institutions.  
5  
6  
7  
8  
9

## 10 **DISCUSSION**

11  
12 The protocol and future results of the current study should be analysed taking  
13 into account previously published data. In the large CENTER-TBI cohort study,  
14 performance of a panel of six blood biomarkers including UCH-L1 and GFAP showed  
15 trends in biomarker ability to improve diagnosis, triage and clinical care in TBI in a  
16 wide range of contexts of care (Emergency Room, ward admission and ICU) and  
17 severities. GFAP, measured within 24 h following mTBI was found to improve the  
18 prediction of CT abnormalities [18]. Although the combination of GFAP and UCH-L1  
19 did not enhance this performance, compared to GFAP alone [18], it should be noted  
20 that GFAP and UCH-L1 were measured within 24-h after TBI using a research-use  
21 only (RUO) assay with poor agreement between replicates of biomarker  
22 assessments. No cut-off values for GFAP or UCH-L1 were obtained or predefined in  
23 the analysis. The present study will evaluate the diagnostic accuracy on the presence  
24 of CT findings of the combination of GFAP and UCH-L1, measured within 12 hours  
25 post-TBI, using an automated VIDAS® IVD-platform, in mild TBI patients. In addition,  
26 an external validation of the cut-off values for these two biomarkers will be  
27 performed. Finally, GFAP and UCH-L1 will be assessed regarding their possible  
28 prediction of mid-term neurological outcome and quality of life.  
29  
30  
31  
32  
33  
34  
35  
36  
37  
38  
39  
40  
41

42 There are some limitations with the BRAINI protocol. First, variability in mTBI  
43 management and CT ordering may be expected in Spain, as there is no consensus  
44 regarding which clinical decision rules should be used for ordering CT, and inter-  
45 centre differences may exist in France as well. This may in turn influence the CT-  
46 positive prevalence across the sites. To understand the variability in CT ordering  
47 between and within countries and centres, the reason for performing cranial CT will  
48 be recorded and analysed in relation to the degree of compliance with clinical  
49 decision rules for CT ordering and the percentage of positive CTs in each centre.  
50 This information could help understand the generalizability of the results. Second,  
51 differences might occur between local and central CT readings. To mitigate this risk,  
52 an additional independent central CT reading will be performed for final adjudication.  
53  
54  
55  
56  
57  
58  
59  
60

1  
2  
3 Third, only mTBI patients with brain CT scans will be included in this study. Patients  
4 discharged from the ED following clinical examination without CT scan will not be  
5 included; therefore, their GFAP and UCH-L1 concentrations will not be captured. As  
6 a consequence, the value of GFAP and UCH-L1 in all TBI presentations will not be  
7 determined.  
8  
9  
10  
11  
12  
13  
14

## 15 REFERENCES

- 17 1 Teasdale G, Jennett B. ASSESSMENT OF COMA AND IMPAIRED  
18 CONSCIOUSNESS: A Practical Scale. *Lancet* 1974;**304**:81–4.  
19 doi:10.1016/S0140-6736(74)91639-0  
20  
21
- 22 2 Levin HS, Diaz-Arrastia RR. Diagnosis, prognosis, and clinical management of  
23 mild traumatic brain injury. *Lancet Neurol*. 2015;**14**:506–17.  
24 doi:10.1016/S1474-4422(15)00002-2  
25  
26
- 27 3 Gomez PA, Lobato RD, Lagares A, *et al*. Mild head injury in adults. A review.  
28 *Neurocirugia* 2000;**11**.  
29  
30
- 31 4 Gómez PA, Lobato RD, Ortega JM, *et al*. Mild head injury: Differences in  
32 prognosis among patients with a Glasgow Coma Scale score of 13 to 15 and  
33 analysis of factors associated with abnormal CT findings. *Br J Neurosurg*  
34 1996;**10**:453–60. doi:10.1080/02688699647078  
35  
36
- 37 5 Haydel MJ, Preston CA, Mills TJ, *et al*. Indications for Computed Tomography  
38 in Patients with Minor Head Injury. *N Engl J Med* 2000;**343**:100–5.  
39 doi:10.1056/NEJM200007133430204  
40  
41
- 42 6 Stiell IG, Wells GA, Vandemheen K, *et al*. The Canadian CT Head Rule for  
43 patients with minor head injury. *Lancet* 2001;**357**:1391–6. doi:10.1016/S0140-  
44 6736(00)04561-X  
45  
46
- 47 7 Jehlé E, Honnart D, Grasleguen C, *et al*. Traumatisme crânien léger (score de  
48 Glasgow de 13 à 15): Triage, évaluation, examens complémentaires et prise  
49 en charge précoce chez le nouveau-né, l'enfant et l'adulte. *Ann Fr Med*  
50 *d'Urgence* 2012;**2**:199–214. doi:10.1007/s13341-012-0202-4  
51  
52
- 53 8 Melnick ER, Szlezak C, Bentley S, *et al*. CT Overuse for Mild Traumatic Brain  
54  
55  
56  
57  
58  
59  
60



- Injury. *Jt Comm J Qual Patient Saf* 2012;**38**:483–9.
- 9 Undén J, Ingebrigtsen T, Romner B. Scandinavian guidelines for initial management of minimal, mild and moderate head injuries in adults: An evidence and consensus-based update. *BMC Med* 2013;**11**:50. doi:10.1186/1741-7015-11-50
- 10 Papa L, Brophy GM, Welch RD, *et al.* Time course and diagnostic accuracy of glial and neuronal blood biomarkers GFAP and UCH-L1 in a large cohort of trauma patients with and without mild traumatic brain injury. *JAMA Neurol* 2016;**73**:551–60. doi:10.1001/jamaneurol.2016.0039
- 11 Diaz-Arrastia R, Wang KKW, Papa L, *et al.* Acute biomarkers of traumatic brain injury: Relationship between plasma levels of ubiquitin C-terminal hydrolase-L1 and glial fibrillary acidic protein. *J Neurotrauma* 2014;**31**:19–25. doi:10.1089/neu.2013.3040
- 12 Bazarian JJ, Biberthaler P, Welch RD, *et al.* Serum GFAP and UCH-L1 for prediction of absence of intracranial injuries on head CT (ALERT-TBI): a multicentre observational study. *Lancet Neurol* 2018;**17**:782–9. doi:10.1016/S1474-4422(18)30231-X
- 13 Banyan BTI Package Insert. [http://banyanbio.com/assets/files/BanyanBTI\\_IFU\\_700027\\_v1.pdf](http://banyanbio.com/assets/files/BanyanBTI_IFU_700027_v1.pdf) (accessed 1 Jun 2020).
- 14 Maas AIR, Lingsma HF. ALERT-TBI study on biomarkers for TBI: has science suffered? *Lancet Neurol* 2018;**17**:737–8. doi:10.1016/S1474-4422(18)30275-8
- 15 Gill J, Latour L, Diaz-Arrastia R, *et al.* Glial fibrillary acidic protein elevations relate to neuroimaging abnormalities after mild TBI. *Neurology* 2018;**91**:E1385–9. doi:10.1212/WNL.0000000000006321
- 16 Shahjouei S, Sadeghi-Naini M, Yang Z, *et al.* The diagnostic values of UCH-L1 in traumatic brain injury: A meta-analysis. *Brain Inj.* 2018;**32**:1–17. doi:10.1080/02699052.2017.1382717
- 17 Yue JK, Yuh EL, Korley FK, *et al.* Association between plasma GFAP concentrations and MRI abnormalities in patients with CT-negative traumatic

- 1  
2  
3 brain injury in the TRACK-TBI cohort: a prospective multicentre study. *Lancet*  
4 *Neurol* 2019;**18**:953–61. doi:10.1016/S1474-4422(19)30282-0  
5  
6  
7 18 Czeiter E, Amrein K, Gravesteyn BY, *et al*. Blood biomarkers on admission in  
8 acute traumatic brain injury: Relations to severity, CT findings and care path in  
9 the CENTER-TBI study. *EBioMedicine* 2020;**56**.  
10 doi:10.1016/j.ebiom.2020.102785  
11  
12  
13  
14 19 von Steinbüchel N, Wilson L, Gibbons H, *et al*. Quality of Life after Brain Injury  
15 (QOLIBRI): scale validity and correlates of quality of life. *J Neurotrauma*  
16 2010;**27**:1157–65. doi:10.1089/neu.2009.1077  
17  
18  
19  
20 20 Castaño-León AM, Navarro-Main B, Gomez PA, *et al*. Quality of Life After Brain  
21 Injury: Psychometric Properties of the Spanish Translation of the QoLIBRI. *Eval*  
22 *Heal Prof* 2018;**41**. doi:10.1177/0163278717702696  
23  
24  
25  
26 21 Jourdan C, Bayen E, Pradat-Diehl P, *et al*. A comprehensive picture of 4-year  
27 outcome of severe brain injuries. Results from the Paris-TBI study. *Ann Phys*  
28 *Rehabil Med* 2016;**59**:100–6. doi:10.1016/j.rehab.2015.10.009  
29  
30  
31  
32 22 Wilson JTL, Pettigrew LEL, Teasdale GM. Structured interviews for the  
33 glasgow outcome scale and the extended glasgow outcome scale: Guidelines  
34 for their use. *J. Neurotrauma*. 1998;**15**:573–80. doi:10.1089/neu.1998.15.573  
35  
36  
37  
38 23 Teasdale GM, Pettigrew LEL, Wilson JTL, *et al*. Analyzing outcome of  
39 treatment of severe head injury: A review and update on advancing the use of  
40 the Glasgow outcome scale. *J. Neurotrauma*. 1998;**15**:587–97.  
41 doi:10.1089/neu.1998.15.587  
42  
43  
44  
45 24 Herdman M, Gudex C, Lloyd A, *et al*. Development and preliminary testing of  
46 the new five-level version of EQ-5D (EQ-5D-5L). *Qual Life Res* 2011;**20**:1727–  
47 36. doi:10.1007/s11136-011-9903-x  
48  
49  
50  
51 25 King NS, Crawford S, Wenden FJ, *et al*. The Rivermead Post Concussion  
52 Symptoms Questionnaire: a measure of symptoms commonly experienced  
53 after head injury and its reliability. *J Neurol* 1995;**242**:587–92.  
54 doi:10.1007/BF00868811  
55  
56  
57  
58  
59  
60

**Author's contribution:** MR, AL, VB, JDC, OM, VP and JFP initiated the study design, wrote the study protocol and drafted the manuscript. All are part of the steering committee of the study. All authors attest to have significantly contributed to refinement of the study protocol and approved the final manuscript. All members of BRAINI contributed to the design and application of the protocol.

**The following are BRAINI investigators:** Maxime Maignan<sup>6</sup>, Laurent Jacquin<sup>7</sup>, Marion Douplat<sup>8</sup>, Said Laribi<sup>9</sup>, Philippe Pes<sup>10</sup>, Patrick Ray<sup>11</sup>, Jérémy Guenezan<sup>12</sup>, Mustapha Sebbane<sup>13</sup>, Frédéric Balen<sup>14</sup>, Guillaume Durand<sup>15</sup>, Cordelia Abric<sup>16</sup>, Cédric Gil-Jardiné<sup>17</sup>, Podaru Mihai<sup>18</sup>, Julian Morales<sup>19</sup>, Ana Castuera<sup>19</sup>, Mariana Garcia Ponce<sup>20</sup>, Maite Cuesta<sup>20</sup>, Jose A. F. Alén<sup>21</sup>

<sup>6</sup> Emergency Department, University Hospital, Grenoble, France; <sup>7</sup> Hospices Civils of Lyon, Emergency department, Edouard Herriot Hospital, Lyon, France ; <sup>8</sup> Hospices Civils de Lyon, Emergency Department, Lyon, France; <sup>9</sup> Department of Emergency Medicine, Tours University Hospital, Tours, France; <sup>10</sup> Department of Emergency Medicine, University Hospital of Nantes, Nantes, France; <sup>11</sup> Emergency Department, University Hospital of Dijon Bourgogne, Dijon, France; <sup>12</sup> CHU de Poitiers, Service des Urgences et SAMU 86, Poitiers, France, Université de Poitiers, Faculté de Médecine et de Pharmacie de Poitiers, Poitiers, France; <sup>13</sup> Department of Emergency Medicine and Prehospital Care, Montpellier University Hospital, Montpellier, France; <sup>14</sup> Emergency Department, Toulouse University Hospital, Toulouse, France; <sup>15</sup> Hôpital Nord-Ouest Villefranche sur Saône, France; <sup>16</sup> CH Ancey Genevois, France; <sup>17</sup> Emergency Department, University Hospital Bordeaux, France ; <sup>18</sup> Servicio de Urgencias, Hospital Universitario del Tajo, Madrid, Spain; <sup>19</sup> Servicio de Urgencias, Hospital Universitario Gregorio Marañón, Madrid, Spain; <sup>20</sup> Servicio de Neurocirugía, Instituto de Investigación imas 12, Hospital Universitario 12 de Octubre, Madrid, Spain; <sup>21</sup> Servicio de Neurocirugia, Hospital Universitario de la Princesa, Madrid, Spain.

**Funding:** This study is supported by a grant from the European Institute of Innovation and Technology (EIT) Health (BP 2019-2020). EIT Health is supported by EIT, a body of the European Union.

bioMérieux is responsible for the development and manufacturing of the VIDAS® GFAP and VIDAS® UCHL-1 assays. bioMérieux will provide in-kind support to the

1  
2  
3 study by supplying the assays for the measurement of UCH-L1 and GFAP necessary  
4 for this study.  
5  
6  
7  
8

9 **Competing interests:** VB, OM and VP are employees of bioMérieux.  
10  
11  
12  
13  
14  
15

16 **Study status:** Recruitment started in August 2019. Study completion is planned in  
17 June 2021.  
18  
19  
20  
21  
22  
23  
24  
25  
26  
27  
28  
29  
30  
31  
32  
33  
34  
35  
36  
37  
38  
39  
40  
41  
42  
43  
44  
45  
46  
47  
48  
49  
50  
51  
52  
53  
54  
55  
56  
57  
58  
59  
60

1  
2  
3  
4  
5 **Figure Legend**  
6  
7  
8  
9

10 Fig. 1. Study design and flow of the BRAINI study.  
11  
12  
13  
14  
15  
16  
17  
18  
19  
20  
21  
22  
23  
24  
25  
26  
27  
28  
29  
30  
31  
32  
33  
34  
35  
36  
37  
38  
39  
40  
41  
42  
43  
44  
45  
46  
47  
48  
49  
50  
51  
52  
53  
54  
55  
56  
57  
58  
59  
60

For peer review only

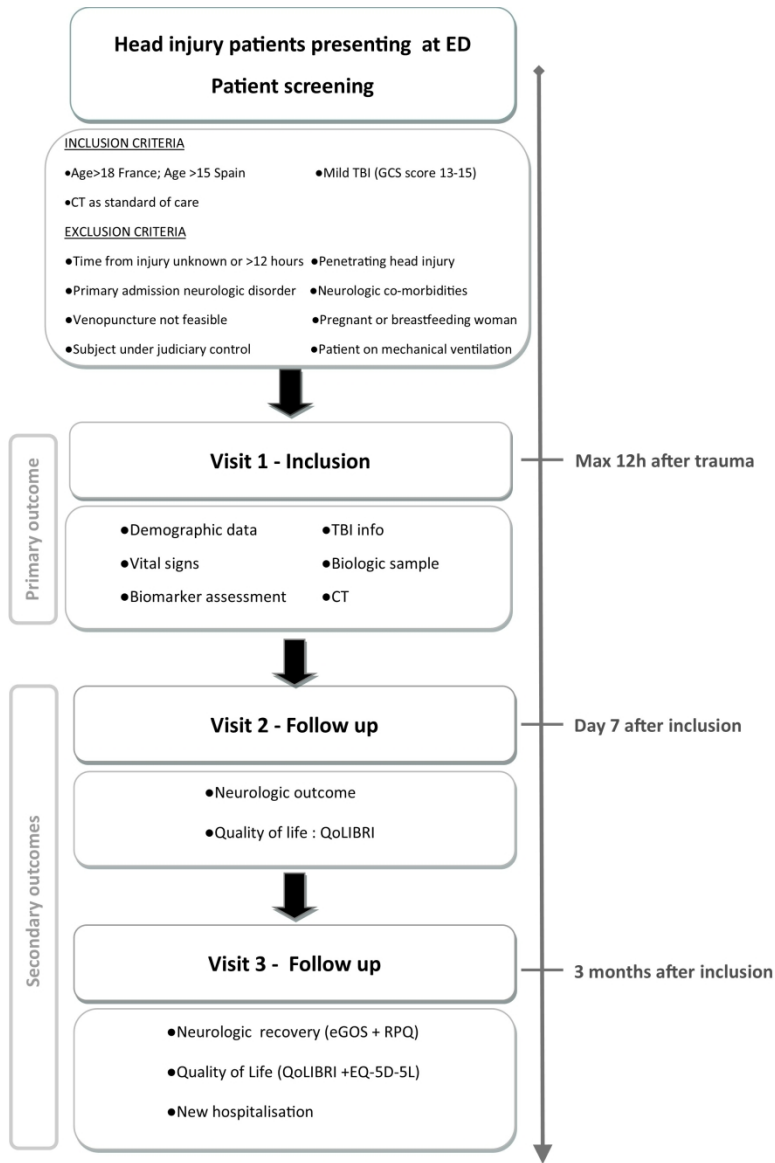

Figure 1. Study design and flow of the BRAINI study.

656x927mm (96 x 96 DPI)
